# Supplementary material for: An integrated experimental and theoretical approach to probe Cr(vi) uptake using decorated halloysite nanotubes for efficient water treatment
Source: Royal Society of Chemistry journal article supplement (doi:10.1039/d3ra07675j), 2024-01-01
Supplement: d3ra07675j1.pdf [file d3ra07675j1.pdf]

## Electronic Supplementary Information

# An Integrated Experimental and Theoretical Approach to Probe Cr(VI) Uptake using Decorated Halloysite Nanotubes for Efficient Water Treatment

Syed Nadeem Ahmad Shah<sup>1</sup>, Sonia Zulfiqar<sup>2,3\*</sup>, Fernando Ruipérez<sup>4</sup>, Muhammad Rafique<sup>5</sup>, Mudassir Iqbal<sup>1</sup>, Michael J. Forrester<sup>3</sup>, Muhammad Ilyas Sarwar (Late)<sup>5</sup> and Eric W. Cochran<sup>3\*</sup>

<sup>1</sup>*Department of Chemistry, School of Natural Sciences, National University of Sciences and Technology, H-12, Islamabad, 44000, Pakistan.*

<sup>2</sup>*Department of Chemistry, Faculty of Science, University of Ostrava, 30. Dubna 22, Ostrava 701 03, Czech Republic*

<sup>3</sup>*Department of Chemical and Biological Engineering, Iowa State University, Sweeney Hall, 618 Bissell Road, Ames, Iowa 50011, United States*

<sup>4</sup>*POLYMAT and Physical Chemistry Department, Faculty of Pharmacy, University of the Basque Country UPV/EHU, 01006 Vitoria-Gasteiz, Spain*

<sup>5</sup>*Department of Chemistry, Quaid-i-Azam University, Islamabad, 45320, Pakistan.*

\*Corresponding Author: Prof. Dr. Sonia Zulfiqar  
Email: [zulfiqar@iastate.edu](mailto:zulfiqar@iastate.edu) ; [sonia.zulfiqar@osu.cz](mailto:sonia.zulfiqar@osu.cz)

\*Corresponding Author: Prof. Dr. Eric W. Cochran  
Email: [ecochran@iastate.edu](mailto:ecochran@iastate.edu)

## Cartesian coordinates

### HCrO<sub>4</sub><sup>-</sup>:

|    |           |           |           |
|----|-----------|-----------|-----------|
| Cr | -1.411592 | 0.597902  | -0.059386 |
| O  | -0.821598 | 1.461145  | 1.435790  |
| O  | -2.996830 | 0.634967  | 0.004791  |
| O  | -0.849249 | -0.891073 | -0.025363 |
| O  | -0.849234 | 1.371835  | -1.331868 |
| H  | 0.140353  | 1.462129  | 1.437560  |

### H1:

|    |           |           |           |
|----|-----------|-----------|-----------|
| C  | -0.705069 | 0.393824  | -0.006975 |
| C  | 0.664288  | 0.611746  | -0.100754 |
| C  | 1.189091  | 1.903615  | -0.071836 |
| C  | 0.314618  | 2.995923  | 0.042292  |
| C  | -1.057224 | 2.780955  | 0.147573  |
| C  | -1.563859 | 1.484549  | 0.121700  |
| H  | -1.113487 | -0.611071 | -0.014419 |
| H  | 1.345209  | -0.228337 | -0.184343 |
| H  | -1.733204 | 3.622648  | 0.247927  |
| C  | 2.663504  | 2.099046  | -0.114143 |
| N  | 3.289636  | 1.646515  | -1.147184 |
| N  | 3.260666  | 2.707732  | 0.951114  |
| H  | 4.214571  | 3.012992  | 0.834586  |
| H  | 2.683668  | 3.212779  | 1.604532  |
| O  | 4.671261  | 1.906347  | -1.004678 |
| H  | 5.043273  | 1.533288  | -1.807909 |
| C  | 0.825032  | 4.394914  | 0.009168  |
| N  | 0.513318  | 5.157586  | 1.000716  |
| N  | 1.545067  | 4.791212  | -1.081608 |
| O  | 1.063858  | 6.440480  | 0.792347  |
| H  | 2.053089  | 5.658688  | -0.997824 |
| H  | 1.939761  | 4.080708  | -1.678325 |
| H  | 0.791064  | 6.920793  | 1.578363  |
| O  | -2.911240 | 1.304465  | 0.255753  |
| Si | -3.905304 | 0.710408  | -0.920532 |
| O  | -3.783799 | 1.623189  | -2.285748 |
| H  | -3.793284 | 2.578872  | -2.203018 |
| O  | -5.364876 | 0.731768  | -0.189387 |
| H  | -6.043752 | 0.154846  | -0.543816 |
| O  | -3.534267 | -0.816170 | -1.400518 |
| H  | -3.073769 | -0.896057 | -2.239328 |

**H2:**

|    |           |           |           |
|----|-----------|-----------|-----------|
| C  | -0.674339 | 0.381195  | -0.122065 |
| C  | 0.691143  | 0.604077  | -0.257149 |
| C  | 1.224689  | 1.888111  | -0.150725 |
| C  | 0.360038  | 2.971118  | 0.081463  |
| C  | -1.006712 | 2.749713  | 0.230342  |
| C  | -1.520706 | 1.459906  | 0.129039  |
| H  | -1.087487 | -0.619678 | -0.188479 |
| H  | 1.364296  | -0.227949 | -0.433868 |
| H  | -1.672919 | 3.582911  | 0.424916  |
| C  | 2.697090  | 2.084598  | -0.233542 |
| N  | 3.320497  | 1.662159  | -1.276374 |
| N  | 3.327764  | 2.671220  | 0.847855  |
| H  | 2.729680  | 3.134173  | 1.517821  |
| H  | 4.165705  | 3.191166  | 0.613483  |
| C  | 0.877466  | 4.367175  | 0.126201  |
| N  | 0.608619  | 5.092229  | 1.153278  |
| N  | 1.581509  | 4.826530  | -0.971917 |
| H  | 1.903710  | 4.122664  | -1.621809 |
| H  | 2.278025  | 5.530214  | -0.753506 |
| O  | -2.862972 | 1.271321  | 0.309452  |
| Si | -3.908270 | 0.777874  | -0.867924 |
| O  | -3.834194 | 1.798771  | -2.158605 |
| H  | -3.804029 | 2.743274  | -1.993711 |
| O  | -5.338473 | 0.745395  | -0.080586 |
| H  | -6.031626 | 0.196535  | -0.451545 |
| O  | -3.576086 | -0.707831 | -1.485721 |
| H  | -3.129373 | -0.721913 | -2.335604 |
| N  | 1.149755  | 6.391124  | 1.077649  |
| H  | 0.812762  | 6.878830  | 0.245419  |
| H  | 0.817550  | 6.894556  | 1.890496  |
| N  | 4.710431  | 1.898855  | -1.229763 |
| H  | 5.127011  | 1.454573  | -0.409212 |
| H  | 5.108098  | 1.464458  | -2.053029 |

**H3:**

|   |           |           |           |
|---|-----------|-----------|-----------|
| C | 1.795798  | -1.992482 | -1.098646 |
| C | 0.433977  | -2.000472 | -0.819444 |
| C | -0.198289 | -0.894360 | -0.250574 |
| C | 0.566319  | 0.241851  | 0.061265  |
| C | 1.930048  | 0.254760  | -0.224024 |
| C | 2.541998  | -0.855619 | -0.797550 |
| H | 2.281929  | -2.849624 | -1.552388 |
| H | -0.161574 | -2.879607 | -1.042685 |
| H | 2.518412  | 1.139263  | -0.005530 |

|    |           |           |           |
|----|-----------|-----------|-----------|
| C  | -1.664950 | -0.975652 | 0.010499  |
| N  | -2.047856 | -1.915853 | 0.823271  |
| N  | -2.497912 | -0.098930 | -0.606174 |
| H  | -3.485475 | -0.186548 | -0.361033 |
| C  | -0.011981 | 1.463891  | 0.698473  |
| N  | 0.058169  | 2.553997  | 0.008458  |
| N  | -0.578603 | 1.388251  | 1.940676  |
| H  | -0.712764 | 2.303993  | 2.353716  |
| O  | 3.878531  | -0.797631 | -1.087162 |
| Si | 5.032294  | -1.668865 | -0.292233 |
| O  | 4.970493  | -1.356806 | 1.323840  |
| H  | 4.834085  | -0.451821 | 1.611161  |
| O  | 6.407259  | -1.208137 | -1.044220 |
| H  | 7.165548  | -1.789510 | -0.964494 |
| O  | 4.850699  | -3.297245 | -0.415841 |
| H  | 4.440072  | -3.733755 | 0.334557  |
| N  | -0.505602 | 3.672548  | 0.676881  |
| H  | -1.517812 | 3.540845  | 0.723317  |
| N  | -3.470810 | -1.943364 | 0.964832  |
| H  | -3.637287 | -2.375713 | 1.866163  |
| C  | -0.486684 | 0.263551  | 2.856838  |
| C  | -1.853886 | -0.102392 | 3.434950  |
| H  | 0.220174  | 0.478433  | 3.667605  |
| H  | -0.100370 | -0.602174 | 2.316724  |
| H  | -2.144022 | 0.628633  | 4.199446  |
| H  | -2.593693 | -0.049523 | 2.623581  |
| C  | -0.225926 | 4.889769  | -0.078701 |
| C  | 1.243217  | 5.278178  | 0.038691  |
| H  | -0.850643 | 5.684343  | 0.348121  |
| H  | -0.481398 | 4.784230  | -1.142662 |
| H  | 1.516402  | 5.296833  | 1.105815  |
| H  | 1.843254  | 4.497837  | -0.438166 |
| C  | -2.154753 | 0.784126  | -1.703275 |
| C  | -3.159621 | 0.725885  | -2.849710 |
| H  | -1.160125 | 0.520016  | -2.074761 |
| H  | -2.079702 | 1.823930  | -1.364150 |
| H  | -2.800231 | 1.423191  | -3.620572 |
| H  | -4.130104 | 1.100327  | -2.501819 |
| C  | -4.126655 | -2.753290 | -0.072915 |
| C  | -5.529905 | -2.234209 | -0.369409 |
| H  | -4.165322 | -3.818734 | 0.197680  |
| H  | -3.528113 | -2.679735 | -0.986944 |
| H  | -6.062793 | -2.994633 | -0.963934 |
| H  | -6.079840 | -2.114156 | 0.571291  |
| N  | 1.482807  | 6.537730  | -0.661293 |
| H  | 1.104028  | 7.323457  | -0.143305 |
| H  | 2.473608  | 6.705787  | -0.787588 |

|   |           |           |           |
|---|-----------|-----------|-----------|
| N | -1.754842 | -1.416276 | 4.061536  |
| H | -2.594499 | -1.641873 | 4.582019  |
| H | -1.631593 | -2.117445 | 3.334048  |
| N | -3.349798 | -0.638838 | -3.349562 |
| H | -3.762037 | -0.627409 | -4.276337 |
| H | -2.457756 | -1.118603 | -3.427306 |
| N | -5.448749 | -0.935001 | -1.032117 |
| H | -4.999337 | -1.037493 | -1.943715 |
| H | -6.368839 | -0.531152 | -1.163871 |

#### **H4:**

|    |           |           |           |
|----|-----------|-----------|-----------|
| C  | 3.417852  | -1.440812 | -1.792066 |
| C  | 2.182383  | -1.694890 | -1.207895 |
| C  | 1.475163  | -0.693806 | -0.542373 |
| C  | 2.033582  | 0.592062  | -0.450935 |
| C  | 3.267483  | 0.851077  | -1.042875 |
| C  | 3.957284  | -0.159745 | -1.706444 |
| H  | 3.959322  | -2.216899 | -2.322501 |
| H  | 1.745015  | -2.685974 | -1.268647 |
| H  | 3.693430  | 1.847447  | -0.992995 |
| C  | 0.157422  | -1.026020 | 0.068718  |
| N  | 0.147837  | -2.015247 | 0.906844  |
| N  | -0.916236 | -0.255854 | -0.243717 |
| H  | -1.753869 | -0.429155 | 0.303928  |
| C  | 1.376918  | 1.711652  | 0.290771  |
| N  | 0.970004  | 2.719534  | -0.403914 |
| N  | 1.242712  | 1.632981  | 1.654864  |
| H  | 1.120176  | 2.552219  | 2.068449  |
| O  | 5.157198  | 0.135649  | -2.295655 |
| Si | 6.609378  | -0.423314 | -1.747515 |
| O  | 6.820638  | -0.002930 | -0.168664 |
| H  | 6.555045  | 0.875789  | 0.109749  |
| O  | 7.669091  | 0.239689  | -2.798957 |
| H  | 8.527712  | -0.179772 | -2.877320 |
| O  | 6.757076  | -2.059773 | -1.772792 |
| H  | 6.604384  | -2.509233 | -0.938038 |
| N  | 0.378856  | 3.733535  | 0.384613  |
| H  | -0.450830 | 3.349117  | 0.844566  |
| N  | -1.153496 | -2.332501 | 1.402852  |
| H  | -0.971518 | -2.870880 | 2.246438  |
| C  | 1.922572  | 0.650851  | 2.485286  |
| C  | 1.276283  | 0.612051  | 3.868168  |
| H  | 2.997443  | 0.856507  | 2.585171  |
| H  | 1.811908  | -0.328207 | 2.019075  |
| H  | 1.481540  | 1.552806  | 4.394343  |
| H  | 0.183346  | 0.540916  | 3.723861  |

|   |           |           |           |
|---|-----------|-----------|-----------|
| C | -0.003338 | 4.861299  | -0.465660 |
| C | -0.765428 | 5.935479  | 0.321657  |
| H | -0.612705 | 4.540223  | -1.323551 |
| H | 0.925812  | 5.272856  | -0.867702 |
| H | -0.513814 | 5.827749  | 1.392698  |
| H | -0.414771 | 6.922948  | 0.009421  |
| C | -1.165292 | 0.348461  | -1.539039 |
| C | -2.185665 | 1.468716  | -1.369970 |
| H | -1.535661 | -0.405365 | -2.251461 |
| H | -0.242452 | 0.768578  | -1.945561 |
| H | -2.415293 | 1.896257  | -2.361359 |
| H | -1.702628 | 2.253325  | -0.781945 |
| C | -1.870450 | -3.203709 | 0.465519  |
| C | -3.168767 | -3.704576 | 1.090973  |
| H | -1.259820 | -4.064539 | 0.156300  |
| H | -2.097873 | -2.626355 | -0.438166 |
| H | -2.927628 | -4.360102 | 1.935803  |
| H | -3.730631 | -2.846386 | 1.496538  |
| N | -2.205923 | 5.902786  | 0.074771  |
| H | -2.629234 | 6.746009  | 0.448232  |
| N | 1.806252  | -0.484512 | 4.664451  |
| H | 1.604801  | -0.325013 | 5.641762  |
| N | -3.372162 | 1.016666  | -0.659073 |
| H | -3.806620 | 1.796542  | -0.164619 |
| N | -3.942943 | -4.468291 | 0.117728  |
| H | -4.462972 | -5.204433 | 0.579903  |
| C | -4.839829 | -3.662251 | -0.694231 |
| C | -5.323535 | -4.438528 | -1.913976 |
| H | -4.299251 | -2.775551 | -1.042662 |
| H | -5.709742 | -3.284294 | -0.123941 |
| H | -4.465549 | -4.627354 | -2.565188 |
| H | -5.702007 | -5.423468 | -1.596220 |
| C | -4.374898 | 0.386446  | -1.504340 |
| C | -5.543157 | -0.111539 | -0.661998 |
| H | -3.921227 | -0.466438 | -2.029126 |
| H | -4.763282 | 1.064959  | -2.284055 |
| H | -5.155115 | -0.835810 | 0.073803  |
| H | -5.942537 | 0.733945  | -0.088438 |
| C | -2.887911 | 4.735384  | 0.602769  |
| C | -4.347744 | 4.708813  | 0.169232  |
| H | -2.819017 | 4.656870  | 1.706337  |
| H | -2.413078 | 3.839758  | 0.193648  |
| H | -4.857726 | 5.617400  | 0.529893  |
| H | -4.378931 | 4.732444  | -0.923857 |
| C | 1.335687  | -1.806762 | 4.246286  |
| C | 2.412055  | -2.630622 | 3.533363  |
| H | 0.477929  | -1.702047 | 3.566088  |

|   |           |           |           |
|---|-----------|-----------|-----------|
| H | 0.979541  | -2.375118 | 5.112631  |
| H | 2.969677  | -1.972558 | 2.849884  |
| H | 3.133164  | -2.994904 | 4.273328  |
| N | 1.786583  | -3.766626 | 2.860236  |
| H | 1.379657  | -3.434634 | 1.985189  |
| H | 2.471181  | -4.479174 | 2.635999  |
| N | -4.982530 | 3.470563  | 0.622146  |
| H | -5.063969 | 3.449055  | 1.633928  |
| H | -5.919984 | 3.386070  | 0.244522  |
| N | -6.604609 | -0.629826 | -1.515544 |
| H | -6.312321 | -1.471376 | -2.013189 |
| H | -7.418813 | -0.877019 | -0.964531 |
| N | -6.314196 | -3.653196 | -2.652074 |
| H | -6.391711 | -3.964653 | -3.612953 |
| H | -7.234888 | -3.742029 | -2.234626 |

**Complex H1 – HCrO<sub>4</sub><sup>-</sup>:**

|    |           |           |           |
|----|-----------|-----------|-----------|
| C  | 1.071520  | -1.431151 | -0.991012 |
| C  | -0.199889 | -1.878045 | -0.649419 |
| C  | -1.156068 | -1.004750 | -0.130376 |
| C  | -0.819455 | 0.344496  | 0.051204  |
| C  | 0.449920  | 0.801802  | -0.303527 |
| C  | 1.389926  | -0.086378 | -0.814606 |
| H  | 1.815140  | -2.106846 | -1.401429 |
| H  | -0.468965 | -2.920630 | -0.780270 |
| H  | 0.700761  | 1.851078  | -0.184422 |
| C  | -2.517734 | -1.518744 | 0.208285  |
| N  | -2.546681 | -2.409942 | 1.141819  |
| N  | -3.568917 | -1.028025 | -0.519436 |
| H  | -4.484734 | -1.069861 | -0.080880 |
| H  | -3.417404 | -0.142334 | -0.980453 |
| O  | -3.824890 | -2.912776 | 1.427015  |
| H  | -4.437773 | -2.162625 | 1.597659  |
| C  | -1.791775 | 1.299620  | 0.659125  |
| N  | -2.036815 | 2.361650  | -0.036294 |
| N  | -2.289939 | 1.002105  | 1.886307  |
| O  | -2.990828 | 3.159818  | 0.648061  |
| H  | -3.141785 | 1.459674  | 2.208697  |
| H  | -2.203805 | 0.042838  | 2.192579  |
| H  | -3.066019 | 3.930552  | 0.079159  |
| O  | 2.643939  | 0.379188  | -1.140972 |
| Si | 3.923537  | 0.161802  | -0.123575 |
| O  | 3.477461  | 0.550563  | 1.411393  |
| H  | 2.602187  | 0.921758  | 1.550814  |
| O  | 5.117689  | 1.096092  | -0.738533 |
| H  | 5.999771  | 0.722827  | -0.697586 |

|    |           |           |           |
|----|-----------|-----------|-----------|
| O  | 4.504940  | -1.382090 | -0.084592 |
| H  | 4.128336  | -1.947755 | 0.593794  |
| Cr | -5.909128 | 0.781150  | 1.692187  |
| O  | -7.449346 | 1.046904  | 1.890450  |
| O  | -5.602611 | -0.799237 | 1.592656  |
| O  | -5.045899 | 1.470548  | 2.837028  |
| O  | -5.374131 | 1.518228  | 0.144017  |
| H  | -4.647875 | 2.141758  | 0.301700  |

**Complex H2 – HCrO<sub>4</sub><sup>-</sup>:**

|    |           |           |           |
|----|-----------|-----------|-----------|
| C  | -2.950797 | 1.493580  | -0.931931 |
| C  | -1.679222 | 2.037768  | -0.785860 |
| C  | -0.576239 | 1.232251  | -0.499816 |
| C  | -0.763291 | -0.152378 | -0.355491 |
| C  | -2.033479 | -0.705390 | -0.520567 |
| C  | -3.119599 | 0.117114  | -0.799507 |
| H  | -3.808741 | 2.117353  | -1.162719 |
| H  | -1.523276 | 3.105909  | -0.894639 |
| H  | -2.169710 | -1.779304 | -0.436946 |
| C  | 0.780553  | 1.843809  | -0.374220 |
| N  | 0.929037  | 2.729068  | 0.547538  |
| N  | 1.734606  | 1.430296  | -1.278216 |
| H  | 2.706804  | 1.464991  | -0.979664 |
| H  | 1.540581  | 0.567789  | -1.766856 |
| C  | 0.382175  | -1.037135 | 0.010300  |
| N  | 0.605199  | -2.050242 | -0.752438 |
| N  | 1.065054  | -0.726782 | 1.162252  |
| H  | 2.067454  | -0.940175 | 1.224187  |
| H  | 0.858533  | 0.185258  | 1.546587  |
| O  | -4.371947 | -0.445086 | -0.934806 |
| Si | -5.440353 | -0.424407 | 0.319705  |
| O  | -4.661130 | -0.835771 | 1.709833  |
| H  | -3.732095 | -1.075243 | 1.646814  |
| O  | -6.635968 | -1.456229 | -0.110622 |
| H  | -7.524252 | -1.176630 | 0.117181  |
| O  | -6.161745 | 1.039121  | 0.574578  |
| H  | -5.705553 | 1.621528  | 1.186563  |
| Cr | 4.602079  | -0.423981 | 0.165270  |
| O  | 6.157013  | -0.686259 | 0.130205  |
| O  | 4.284173  | 1.149131  | 0.239517  |
| O  | 3.900846  | -1.214951 | 1.369713  |
| O  | 3.845576  | -1.046899 | -1.325089 |
| H  | 3.185467  | -1.737659 | -1.105509 |
| N  | 2.193450  | 3.325685  | 0.631712  |
| H  | 2.236122  | 3.792095  | 1.528060  |
| H  | 2.965638  | 2.652919  | 0.583622  |



|   |          |           |           |
|---|----------|-----------|-----------|
| N | 1.743641 | -2.803025 | -0.421582 |
| H | 1.886426 | -2.916535 | 0.583568  |
| H | 1.647132 | -3.712391 | -0.854214 |

**Complex H3 – HCrO<sub>4</sub><sup>-</sup>:**

|    |           |           |           |
|----|-----------|-----------|-----------|
| C  | -4.040678 | 1.259881  | -0.758946 |
| C  | -2.841128 | 1.948745  | -0.629132 |
| C  | -1.617083 | 1.283311  | -0.516951 |
| C  | -1.606286 | -0.122933 | -0.535185 |
| C  | -2.810879 | -0.813765 | -0.679786 |
| C  | -4.016599 | -0.130633 | -0.778896 |
| H  | -4.986522 | 1.784026  | -0.850370 |
| H  | -2.837928 | 3.032971  | -0.601984 |
| H  | -2.794442 | -1.897517 | -0.736963 |
| C  | -0.405994 | 2.141506  | -0.332512 |
| N  | -0.461346 | 2.957822  | 0.687020  |
| N  | 0.627287  | 2.095299  | -1.193376 |
| H  | 1.456790  | 2.594731  | -0.878173 |
| C  | -0.368522 | -0.962261 | -0.450259 |
| N  | -0.173739 | -1.739153 | -1.476947 |
| N  | 0.440996  | -0.887092 | 0.626009  |
| H  | 1.306897  | -1.425523 | 0.560889  |
| O  | -5.187530 | -0.844334 | -0.906202 |
| Si | -6.150747 | -1.146236 | 0.395234  |
| O  | -5.242685 | -1.698050 | 1.651372  |
| H  | -4.339291 | -1.974845 | 1.478014  |
| O  | -7.272059 | -2.199566 | -0.164542 |
| H  | -8.135391 | -2.146938 | 0.248860  |
| O  | -6.970203 | 0.168667  | 0.963071  |
| H  | -6.517885 | 0.664805  | 1.649829  |
| N  | 1.019054  | -2.511581 | -1.317413 |
| H  | 1.387572  | -2.647431 | -2.252290 |
| N  | 0.704013  | 3.793185  | 0.745140  |
| H  | 0.839069  | 3.994126  | 1.730671  |
| C  | 0.202422  | -0.199229 | 1.877913  |
| C  | 1.355159  | 0.737737  | 2.229160  |
| H  | 0.072142  | -0.929149 | 2.687090  |
| H  | -0.723377 | 0.377958  | 1.804914  |
| H  | 2.237573  | 0.145359  | 2.486233  |
| H  | 1.616534  | 1.330771  | 1.343813  |
| C  | 0.751457  | -3.815439 | -0.718531 |
| C  | 2.059110  | -4.580447 | -0.562964 |
| H  | 0.022707  | -4.400575 | -1.310279 |
| H  | 0.313590  | -3.662707 | 0.273612  |
| H  | 2.598570  | -4.581248 | -1.524522 |
| H  | 2.686132  | -4.038978 | 0.148981  |

|    |           |           |           |
|----|-----------|-----------|-----------|
| C  | 0.829132  | 1.309297  | -2.393624 |
| C  | 2.164791  | 0.569162  | -2.283321 |
| H  | 0.854820  | 1.987934  | -3.258942 |
| H  | 0.012221  | 0.601341  | -2.540205 |
| H  | 2.340688  | 0.013803  | -3.214376 |
| H  | 2.094971  | -0.173913 | -1.484978 |
| C  | 0.488895  | 5.050892  | 0.034870  |
| C  | 1.759785  | 5.889680  | 0.077019  |
| H  | -0.362076 | 5.620278  | 0.450746  |
| H  | 0.245636  | 4.823888  | -1.007783 |
| H  | 2.105310  | 5.969993  | 1.122682  |
| H  | 2.543559  | 5.363861  | -0.476001 |
| N  | 1.797353  | -5.928225 | -0.049256 |
| H  | 1.420247  | -6.527074 | -0.776637 |
| H  | 2.656386  | -6.353292 | 0.279884  |
| N  | 0.958736  | 1.549379  | 3.382480  |
| H  | 1.743994  | 2.103268  | 3.706307  |
| H  | 0.222899  | 2.189669  | 3.092249  |
| N  | 3.244064  | 1.510486  | -1.976875 |
| H  | 3.795639  | 1.164163  | -1.191694 |
| H  | 3.864292  | 1.635847  | -2.766440 |
| N  | 1.531728  | 7.188530  | -0.556467 |
| H  | 0.886224  | 7.748318  | -0.008838 |
| H  | 2.397228  | 7.710115  | -0.633928 |
| Cr | 4.366340  | -1.401715 | 0.513513  |
| O  | 5.845313  | -1.926185 | 1.407958  |
| O  | 3.115187  | -2.001811 | 1.298999  |
| O  | 4.456433  | -1.969758 | -0.962584 |
| O  | 4.308322  | 0.192004  | 0.480608  |
| H  | 6.632801  | -1.770863 | 0.877252  |

**Complex H4 – HCrO<sub>4</sub><sup>-</sup>:**

|   |           |           |           |
|---|-----------|-----------|-----------|
| C | -4.252652 | -2.028137 | 1.889008  |
| C | -2.959868 | -1.937958 | 1.385254  |
| C | -2.537022 | -0.818869 | 0.667823  |
| C | -3.441408 | 0.234016  | 0.449428  |
| C | -4.734432 | 0.151027  | 0.962893  |
| C | -5.138866 | -0.977060 | 1.671099  |
| H | -4.575444 | -2.893458 | 2.458774  |
| H | -2.252776 | -2.744867 | 1.546687  |
| H | -5.429484 | 0.971898  | 0.816987  |
| C | -1.147786 | -0.787079 | 0.127511  |
| N | -0.802183 | -1.788226 | -0.619140 |
| N | -0.380145 | 0.302820  | 0.391414  |
| H | 0.502331  | 0.348281  | -0.111444 |
| C | -3.095889 | 1.442852  | -0.360449 |

|    |           |           |           |
|----|-----------|-----------|-----------|
| N  | -3.042070 | 2.574200  | 0.256633  |
| N  | -2.865526 | 1.302843  | -1.706161 |
| H  | -2.967085 | 2.185340  | -2.196959 |
| O  | -6.422395 | -1.031610 | 2.156065  |
| Si | -7.584968 | -1.965972 | 1.450735  |
| O  | -7.547213 | -1.745504 | -0.180383 |
| H  | -7.070128 | -0.988439 | -0.528013 |
| O  | -8.971685 | -1.502036 | 2.181880  |
| H  | -9.622133 | -2.190608 | 2.330264  |
| O  | -7.413031 | -3.584784 | 1.701899  |
| H  | -6.949298 | -4.065477 | 1.012049  |
| N  | -2.711712 | 3.652411  | -0.599259 |
| H  | -1.771100 | 3.492250  | -0.970080 |
| N  | 0.548522  | -1.728928 | -1.065905 |
| H  | 0.587694  | -2.383356 | -1.842289 |
| C  | -3.195472 | 0.107573  | -2.463403 |
| C  | -2.445458 | 0.103799  | -3.792190 |
| H  | -4.275128 | 0.013989  | -2.651618 |
| H  | -2.879926 | -0.759662 | -1.884544 |
| H  | -2.807893 | 0.928398  | -4.419415 |
| H  | -1.379372 | 0.289851  | -3.574489 |
| C  | -2.733571 | 4.905884  | 0.155099  |
| C  | -2.268349 | 6.092791  | -0.700417 |
| H  | -2.115263 | 4.848957  | 1.063195  |
| H  | -3.767423 | 5.052903  | 0.478282  |
| H  | -2.397636 | 5.824496  | -1.765388 |
| H  | -2.919193 | 6.950206  | -0.505898 |
| C  | -0.365425 | 1.014360  | 1.657078  |
| C  | 0.291389  | 2.374816  | 1.443809  |
| H  | 0.185463  | 0.438171  | 2.416403  |
| H  | -1.385730 | 1.163036  | 2.019972  |
| H  | 0.359494  | 2.893889  | 2.416773  |
| H  | -0.383151 | 2.958672  | 0.810685  |
| C  | 1.489205  | -2.211936 | -0.041673 |
| C  | 2.899097  | -2.285394 | -0.621306 |
| H  | 1.199376  | -3.201484 | 0.340451  |
| H  | 1.469822  | -1.514915 | 0.802772  |
| H  | 2.891005  | -2.977462 | -1.473600 |
| H  | 3.175448  | -1.289733 | -1.014049 |
| N  | -0.905424 | 6.517340  | -0.387513 |
| H  | -0.723264 | 7.412030  | -0.830460 |
| N  | -2.660712 | -1.146355 | -4.509369 |
| H  | -2.396194 | -1.025383 | -5.477525 |
| N  | 1.574128  | 2.248452  | 0.775883  |
| H  | 1.781276  | 3.087502  | 0.235312  |
| N  | 3.851349  | -2.785986 | 0.357843  |
| H  | 4.671136  | -3.109286 | -0.153216 |

|    |           |           |           |
|----|-----------|-----------|-----------|
| C  | 4.340729  | -1.740862 | 1.253326  |
| C  | 5.304521  | -2.313809 | 2.283214  |
| H  | 3.498308  | -1.268045 | 1.774761  |
| H  | 4.866606  | -0.952694 | 0.692088  |
| H  | 4.748837  | -2.936691 | 2.993735  |
| H  | 6.028240  | -2.962444 | 1.766516  |
| C  | 2.695762  | 1.986407  | 1.669297  |
| C  | 3.984140  | 1.796021  | 0.879909  |
| H  | 2.493701  | 1.071408  | 2.243183  |
| H  | 2.842051  | 2.797045  | 2.406104  |
| H  | 3.852959  | 0.925491  | 0.216742  |
| H  | 4.127850  | 2.666801  | 0.226002  |
| C  | 0.126285  | 5.566106  | -0.763726 |
| C  | 1.500091  | 6.011864  | -0.277463 |
| H  | 0.155889  | 5.372717  | -1.854526 |
| H  | -0.088061 | 4.609524  | -0.280575 |
| H  | 1.743692  | 6.999717  | -0.705052 |
| H  | 1.451774  | 6.134318  | 0.808453  |
| C  | -1.951894 | -2.290584 | -3.928965 |
| C  | -2.865662 | -3.233206 | -3.139442 |
| H  | -1.157967 | -1.940307 | -3.253688 |
| H  | -1.459499 | -2.867052 | -4.719239 |
| H  | -3.580043 | -2.634232 | -2.553434 |
| H  | -3.461532 | -3.828570 | -3.840878 |
| N  | -2.042008 | -4.120487 | -2.325388 |
| H  | -1.663046 | -3.583587 | -1.543239 |
| H  | -2.591051 | -4.882416 | -1.944762 |
| N  | 2.489490  | 4.982911  | -0.580802 |
| H  | 2.698824  | 4.935948  | -1.572095 |
| H  | 3.361705  | 5.140599  | -0.089173 |
| N  | 5.125658  | 1.698200  | 1.777391  |
| H  | 5.008521  | 0.908440  | 2.412954  |
| H  | 5.959641  | 1.462279  | 1.241868  |
| N  | 5.954813  | -1.217063 | 3.005281  |
| H  | 6.517595  | -1.593711 | 3.760689  |
| H  | 6.608692  | -0.767270 | 2.361488  |
| Cr | 7.834804  | -1.415202 | -0.352762 |
| O  | 6.446952  | -2.260797 | -1.181615 |
| O  | 8.414088  | -2.456102 | 0.688888  |
| O  | 7.262021  | -0.116471 | 0.390638  |
| O  | 8.895486  | -1.011846 | -1.456649 |
| H  | 6.197303  | -1.781990 | -1.977933 |
